# Supplementary material
Source: publisher figshare collection journal article supplement (https://sage.figshare.com/ndownloader/files/38644804)
Supplement: Supplementary file 1 [file 38644804]

## Sheet: Black Males
age	Short Sleep LE	Optimal Sleep LE	Long Sleep LE	Total Life Expectancy	Short Proportion	Optional Proportion	Long Proportion
50	10.0895	14.3821	3.70155	28.1731	0.358125	0.510489	0.131386
51	9.79197	13.971	3.635	27.398	0.357398	0.509928	0.132674
52	9.49854	13.5651	3.5682	26.6318	0.356662	0.509356	0.133983
53	9.2093	13.1644	3.50118	25.8749	0.355917	0.508771	0.135312
54	8.92431	12.7691	3.43398	25.1274	0.355163	0.508174	0.136663
55	8.64366	12.3793	3.36663	24.3896	0.3544	0.507565	0.138036
56	8.36743	11.9951	3.29918	23.6618	0.353627	0.506942	0.139431
57	8.0957	11.6168	3.23164	22.9441	0.352844	0.506307	0.140849
58	7.82854	11.2443	3.16408	22.2369	0.352052	0.505658	0.14229
59	7.56601	10.8777	3.09652	21.5403	0.351249	0.504996	0.143755
60	7.3082	10.5174	3.029	20.8546	0.350436	0.504319	0.145244
61	7.05516	10.1632	2.96158	20.1799	0.349613	0.503629	0.146759
62	6.80696	9.81533	2.89428	19.5166	0.348778	0.502923	0.148299
63	6.56365	9.47391	2.82715	18.8647	0.347933	0.502203	0.149865
64	6.32531	9.13901	2.76024	18.2246	0.347076	0.501467	0.151457
65	6.09196	8.81072	2.69359	17.5963	0.346208	0.500715	0.153077
66	5.86367	8.48914	2.62724	16.98	0.345327	0.499948	0.154725
67	5.64048	8.17432	2.56124	16.376	0.344435	0.499164	0.156402
68	5.42242	7.86636	2.49563	15.7844	0.34353	0.498363	0.158107
69	5.20953	7.56531	2.43045	15.2053	0.342613	0.497545	0.159842
70	5.00183	7.27124	2.36575	14.6388	0.341683	0.496709	0.161608
71	4.79936	6.98419	2.30158	14.0851	0.340739	0.495856	0.163405
72	4.60212	6.7042	2.23797	13.5443	0.339783	0.494984	0.165233
73	4.41012	6.43131	2.17497	13.0164	0.338813	0.494093	0.167094
74	4.22338	6.16556	2.11261	12.5016	0.337829	0.493183	0.168988
75	4.04189	5.90694	2.05095	11.9998	0.33683	0.492254	0.170916
76	3.86565	5.65548	1.99002	11.5112	0.335818	0.491304	0.172878
77	3.69464	5.41117	1.92986	11.0357	0.33479	0.490335	0.174875
78	3.52884	5.17401	1.87051	10.5734	0.333748	0.489344	0.176908
79	3.36823	4.94398	1.812	10.1242	0.332691	0.488332	0.178977
80	3.21278	4.72104	1.75437	9.68819	0.331618	0.487299	0.181083
81	3.06244	4.50517	1.69765	9.26526	0.330529	0.486243	0.183227
82	2.91718	4.29632	1.64187	8.85537	0.329425	0.485165	0.18541
83	2.77694	4.09443	1.58707	8.45844	0.328304	0.484064	0.187631
84	2.64168	3.89944	1.53327	8.07439	0.327168	0.48294	0.189893
85	2.51132	3.71128	1.48049	7.70309	0.326014	0.481792	0.192194
86	2.38579	3.52988	1.42876	7.34444	0.324844	0.480619	0.194537
87	2.26504	3.35513	1.37811	6.99828	0.323656	0.479423	0.196921
88	2.14897	3.18695	1.32854	6.66447	0.322452	0.478201	0.199347
89	2.03751	3.02524	1.28009	6.34283	0.32123	0.476954	0.201816
90	1.93056	2.86987	1.23275	6.03319	0.319991	0.475681	0.204328
91	1.82805	2.72074	1.18655	5.73534	0.318734	0.474382	0.206884
92	1.72986	2.57772	1.1415	5.44908	0.317459	0.473057	0.209485
93	1.6359	2.44069	1.0976	5.17418	0.316166	0.471705	0.21213
94	1.54607	2.3095	1.05485	4.91042	0.314854	0.470326	0.21482
95	1.46026	2.18401	1.01327	4.65754	0.313525	0.468919	0.217555
96	1.37836	2.06409	0.972857	4.41531	0.312178	0.467485	0.220337
97	1.30027	1.94959	0.933602	4.18346	0.310812	0.466023	0.223165
98	1.22586	1.84035	0.895506	3.96172	0.309427	0.464533	0.22604
99	1.15504	1.73622	0.858563	3.74982	0.308025	0.463014	0.228961
100	1.08767	1.63704	0.822767	3.54748	0.306603	0.461467	0.23193
101	1.02365	1.54267	0.788107	3.35442	0.305164	0.45989	0.234946
102	0.962855	1.45293	0.754574	3.17036	0.303706	0.458285	0.238009
103	0.905175	1.36767	0.722154	2.995	0.302229	0.456651	0.24112
104	0.850492	1.28673	0.690832	2.82805	0.300734	0.454987	0.244278
105	0.798691	1.20995	0.660592	2.66923	0.299222	0.453294	0.247484
106	0.749655	1.13716	0.631417	2.51824	0.297691	0.451572	0.250738
107	0.703271	1.06822	0.603285	2.37478	0.296142	0.44982	0.254038
108	0.659425	1.00296	0.576175	2.23856	0.294575	0.448039	0.257386
109	0.618003	0.941227	0.55006	2.10929	0.292991	0.446229	0.26078
110	0.578888	0.882846	0.52491	1.98664	0.29139	0.44439	0.264219
111	0.541961	0.82765	0.500686	1.8703	0.289773	0.442523	0.267704
112	0.50709	0.775451	0.477332	1.75987	0.28814	0.440629	0.271231
113	0.474116	0.726017	0.45476	1.65489	0.286494	0.438709	0.274797
114	0.442825	0.679027	0.432814	1.55467	0.284836	0.436767	0.278397
115	0.412871	0.633961	0.411192	1.45802	0.283172	0.434808	0.28202
116	0.383605	0.589821	0.389241	1.36267	0.28151	0.432843	0.285646
117	0.353626	0.544452	0.365471	1.26355	0.279867	0.430891	0.289241
118	0.319613	0.49272	0.336235	1.14857	0.278271	0.428986	0.292743
119	0.273009	0.421383	0.292026	0.986417	0.276768	0.427185	0.296047
120	0.190087	0.29371	0.206355	0.690152	0.275428	0.425573	0.298999

## Sheet: Black Females
age	Short Sleep LE	Optimal Sleep LE	Long Sleep LE	Total Life Expectancy	Short Proportion	Optional Proportion	Long Proportion
50	11.5329	16.2268	3.88485	31.6445	0.364452	0.512783	0.122765
51	11.217	15.786	3.80333	30.8063	0.364112	0.512429	0.123459
52	10.9043	15.3498	3.72184	29.9759	0.363768	0.512071	0.124161
53	10.595	14.918	3.6404	29.1534	0.363421	0.511708	0.124871
54	10.2892	14.491	3.55906	28.3392	0.363071	0.511341	0.125588
55	9.98693	14.0689	3.47787	27.5337	0.362717	0.51097	0.126313
56	9.68841	13.6517	3.39685	26.737	0.36236	0.510594	0.127047
57	9.39368	13.2398	3.31606	25.9495	0.361998	0.510213	0.127789
58	9.10286	12.8331	3.23554	25.1715	0.361633	0.509827	0.12854
59	8.81604	12.4319	3.15533	24.4033	0.361265	0.509436	0.129299
60	8.53332	12.0363	3.07547	23.6451	0.360892	0.50904	0.130068
61	8.25482	11.6464	2.99601	22.8973	0.360515	0.508639	0.130846
62	7.98062	11.2625	2.91701	22.1601	0.360134	0.508232	0.131633
63	7.71083	10.8846	2.8385	21.4339	0.359749	0.50782	0.13243
64	7.44554	10.5128	2.76053	20.7189	0.35936	0.507403	0.133237
65	7.18485	10.1474	2.68316	20.0154	0.358966	0.50698	0.134055
66	6.92884	9.78842	2.60642	19.3237	0.358567	0.50655	0.134882
67	6.67761	9.43601	2.53037	18.644	0.358164	0.506115	0.13572
68	6.43125	9.0903	2.45506	17.9766	0.357756	0.505674	0.13657
69	6.18982	8.75141	2.38053	17.3218	0.357344	0.505226	0.13743
70	5.95342	8.41945	2.30683	16.6797	0.356926	0.504772	0.138302
71	5.7221	8.09452	2.23401	16.0506	0.356503	0.504312	0.139185
72	5.49595	7.77673	2.16212	15.4348	0.356075	0.503844	0.140081
73	5.27501	7.46617	2.09119	14.8324	0.355642	0.50337	0.140988
74	5.05935	7.16293	2.02128	14.2436	0.355203	0.502889	0.141908
75	4.84902	6.86706	1.95243	13.6685	0.354758	0.5024	0.142841
76	4.64406	6.57866	1.88468	13.1074	0.354308	0.501904	0.143787
77	4.4445	6.29776	1.81806	12.5603	0.353852	0.501401	0.144747
78	4.25038	6.02441	1.75263	12.0274	0.353391	0.50089	0.14572
79	4.06171	5.75866	1.68841	11.5088	0.352923	0.500371	0.146707
80	3.87852	5.50053	1.62545	11.0045	0.352448	0.499844	0.147708
81	3.7008	5.25004	1.56377	10.5146	0.351968	0.499309	0.148723
82	3.52857	5.00718	1.5034	10.0391	0.351481	0.498765	0.149754
83	3.3618	4.77195	1.44437	9.57812	0.350988	0.498214	0.150799
84	3.20049	4.54433	1.38671	9.13153	0.350487	0.497653	0.15186
85	3.0446	4.3243	1.33044	8.69934	0.349981	0.497083	0.152936
86	2.89411	4.1118	1.27558	8.28149	0.349467	0.496505	0.154028
87	2.74897	3.90679	1.22215	7.87791	0.348946	0.495917	0.155137
88	2.60913	3.70921	1.17016	7.4885	0.348418	0.495321	0.156262
89	2.47453	3.51897	1.11963	7.11313	0.347883	0.494714	0.157403
90	2.34512	3.33598	1.07055	6.75166	0.34734	0.494098	0.158561
91	2.22082	3.16017	1.02295	6.40393	0.34679	0.493473	0.159737
92	2.10155	2.9914	0.976807	6.06976	0.346233	0.492837	0.16093
93	1.98722	2.82958	0.932136	5.74894	0.345668	0.492191	0.162141
94	1.87775	2.67457	0.888931	5.44125	0.345095	0.491536	0.163369
95	1.77303	2.52623	0.847184	5.14645	0.344515	0.49087	0.164615
96	1.67295	2.38444	0.806887	4.86428	0.343927	0.490193	0.16588
97	1.57742	2.24903	0.768027	4.59448	0.34333	0.489507	0.167163
98	1.48632	2.11985	0.730589	4.33676	0.342726	0.488809	0.168464
99	1.39953	1.99673	0.694557	4.09081	0.342114	0.488101	0.169785
100	1.31692	1.87951	0.659911	3.85635	0.341494	0.487382	0.171123
101	1.23838	1.76802	0.626629	3.63303	0.340866	0.486653	0.172481
102	1.16377	1.66208	0.594688	3.42054	0.34023	0.485912	0.173858
103	1.09297	1.56151	0.564061	3.21854	0.339586	0.485161	0.175254
104	1.02585	1.46612	0.534721	3.02669	0.338933	0.484398	0.176668
105	0.962265	1.37574	0.506637	2.84464	0.338273	0.483625	0.178102
106	0.902094	1.29017	0.47978	2.67205	0.337604	0.482841	0.179555
107	0.8452	1.20923	0.454116	2.50855	0.336928	0.482045	0.181027
108	0.791447	1.13274	0.42961	2.35379	0.336243	0.481239	0.182518
109	0.740698	1.06049	0.406225	2.20741	0.335551	0.480421	0.184028
110	0.692815	0.992291	0.38392	2.06903	0.334851	0.479593	0.185556
111	0.647651	0.927944	0.36265	1.93824	0.334143	0.478755	0.187102
112	0.605046	0.867219	0.342357	1.81462	0.333428	0.477906	0.188666
113	0.564811	0.809847	0.322964	1.69762	0.332707	0.477048	0.190245
114	0.526688	0.755465	0.304352	1.5865	0.33198	0.476182	0.191838
115	0.490273	0.703491	0.286305	1.48007	0.33125	0.47531	0.19344
116	0.45481	0.652846	0.268388	1.37604	0.33052	0.474437	0.195043
117	0.418688	0.601213	0.249632	1.26953	0.329797	0.47357	0.196633
118	0.378074	0.543084	0.227679	1.14884	0.329093	0.472725	0.198182
119	0.32302	0.464153	0.196358	0.983531	0.328429	0.471925	0.199646
120	0.225519	0.324147	0.138238	0.687904	0.327834	0.47121	0.200956

## Sheet: Hispanic Males
age	Short Sleep LE	Optimal Sleep LE	Long Sleep LE	Total Life Expectancy	Short Proportion	Optional Proportion	Long Proportion
50	10.4925	20.438	2.81221	33.7427	0.310957	0.6057	0.0833428
51	10.2968	19.9794	2.76046	33.0366	0.311678	0.604765	0.0835575
52	10.1024	19.5262	2.70903	32.3376	0.312403	0.603824	0.0837734
53	9.9093	19.0786	2.65795	31.6459	0.313131	0.602879	0.0839904
54	9.71764	18.6366	2.60722	30.9615	0.313862	0.601929	0.0842086
55	9.52743	18.2002	2.55686	30.2845	0.314597	0.600975	0.084428
56	9.3387	17.7695	2.50687	29.6151	0.315336	0.600015	0.0846485
57	9.15149	17.3445	2.45727	28.9532	0.316078	0.599051	0.0848703
58	8.96585	16.9252	2.40806	28.2991	0.316825	0.598082	0.0850933
59	8.78181	16.5117	2.35926	27.6528	0.317574	0.597108	0.0853175
60	8.59941	16.104	2.31088	27.0143	0.318328	0.596129	0.0855429
61	8.41869	15.7022	2.26293	26.3838	0.319085	0.595145	0.0857696
62	8.23968	15.3062	2.21541	25.7613	0.319847	0.594156	0.0859976
63	8.06242	14.9162	2.16835	25.147	0.320612	0.593161	0.0862269
64	7.88695	14.5321	2.12173	24.5408	0.321381	0.592162	0.0864574
65	7.7133	14.154	2.07559	23.9429	0.322154	0.591157	0.0866893
66	7.54149	13.7818	2.02992	23.3533	0.322931	0.590146	0.0869225
67	7.37158	13.4157	1.98474	22.772	0.323712	0.589131	0.087157
68	7.20358	13.0555	1.94005	22.1992	0.324497	0.58811	0.0873929
69	7.03752	12.7014	1.89586	21.6348	0.325287	0.587083	0.0876301
70	6.87344	12.3534	1.85218	21.079	0.32608	0.586051	0.0878687
71	6.71136	12.0113	1.80902	20.5317	0.326878	0.585014	0.0881087
72	6.55131	11.6753	1.76639	19.993	0.327679	0.58397	0.0883501
73	6.39331	11.3454	1.72428	19.463	0.328485	0.582922	0.0885929
74	6.23739	11.0215	1.68272	18.9416	0.329296	0.581867	0.088837
75	6.08356	10.7036	1.64169	18.4289	0.33011	0.580807	0.0890826
76	5.93185	10.3918	1.60122	17.9249	0.330929	0.579742	0.0893297
77	5.78227	10.0859	1.5613	17.4295	0.331752	0.57867	0.0895781
78	5.63485	9.7861	1.52195	16.9429	0.332579	0.577593	0.089828
79	5.48958	9.49221	1.48315	16.4649	0.33341	0.57651	0.0900793
80	5.3465	9.20427	1.44492	15.9957	0.334246	0.575422	0.090332
81	5.20559	8.92223	1.40726	15.5351	0.335086	0.574328	0.0905862
82	5.06688	8.64607	1.37018	15.0831	0.335931	0.573228	0.0908418
83	4.93037	8.37574	1.33367	14.6398	0.336779	0.572122	0.0910988
84	4.79605	8.1112	1.29773	14.205	0.337632	0.571011	0.0913572
85	4.66394	7.85241	1.26236	13.7787	0.338489	0.569894	0.0916171
86	4.53401	7.5993	1.22758	13.3609	0.33935	0.568772	0.0918783
87	4.40627	7.35182	1.19336	12.9514	0.340215	0.567644	0.0921409
88	4.28071	7.1099	1.15971	12.5503	0.341084	0.566512	0.0924049
89	4.1573	6.87347	1.12663	12.1574	0.341956	0.565373	0.0926702
90	4.03604	6.64245	1.09411	11.7726	0.342833	0.56423	0.0929368
91	3.91688	6.41676	1.06214	11.3958	0.343713	0.563082	0.0932047
92	3.79982	6.1963	1.03072	11.0268	0.344597	0.561929	0.0934738
93	3.6848	5.98097	0.999838	10.6656	0.345485	0.560771	0.0937441
94	3.57179	5.77065	0.969481	10.3119	0.346375	0.559609	0.0940156
95	3.46073	5.56522	0.939636	9.96559	0.347268	0.558444	0.0942881
96	3.35157	5.36454	0.910287	9.6264	0.348164	0.557274	0.0945616
97	3.24423	5.16846	0.881415	9.2941	0.349063	0.556101	0.094836
98	3.13862	4.97681	0.852998	8.96843	0.349964	0.554925	0.0951112
99	3.03466	4.78938	0.825007	8.64905	0.350866	0.553747	0.0953871
100	2.93221	4.60598	0.797413	8.3356	0.35177	0.552567	0.0956635
101	2.83115	4.42633	0.770176	8.02765	0.352674	0.551385	0.0959404
102	2.7313	4.25017	0.743253	7.72472	0.353579	0.550204	0.0962175
103	2.63246	4.07715	0.716589	7.4262	0.354483	0.549022	0.0964947
104	2.53441	3.90689	0.69012	7.13143	0.355386	0.547842	0.0967716
105	2.43685	3.73894	0.663767	6.83956	0.356288	0.546664	0.0970481
106	2.33943	3.57276	0.637435	6.54963	0.357186	0.54549	0.0973239
107	2.24173	3.40769	0.611009	6.26043	0.35808	0.544321	0.0975986
108	2.14323	3.24294	0.584346	5.97052	0.358969	0.543159	0.0978718
109	2.04327	3.07757	0.557268	5.67811	0.359851	0.542006	0.0981432
110	1.94106	2.91038	0.529555	5.38099	0.360725	0.540863	0.0984121
111	1.83557	2.73991	0.50093	5.0764	0.361589	0.539733	0.098678
112	1.72553	2.56429	0.471042	4.76086	0.36244	0.53862	0.0989404
113	1.6093	2.3812	0.439444	4.42994	0.363277	0.537524	0.0991985
114	1.48478	2.18764	0.405562	4.07799	0.364097	0.536451	0.0994515
115	1.34927	1.97975	0.368653	3.69768	0.364898	0.535404	0.0996985
116	1.19922	1.7525	0.327746	3.27947	0.365676	0.534385	0.0999388
117	1.02996	1.4993	0.281563	2.81082	0.366428	0.533401	0.100171
118	0.835302	1.21138	0.228407	2.27509	0.367151	0.532454	0.100395
119	0.60693	0.877046	0.166001	1.64998	0.367841	0.53155	0.100608
120	0.333613	0.480457	0.0912679	0.905338	0.368496	0.530693	0.100811

## Sheet: Hispanic Females
age	Short Sleep LE	Optimal Sleep LE	Long Sleep LE	Total Life Expectancy	Short Proportion	Optional Proportion	Long Proportion
50	12.6733	21.2378	3.22058	37.1317	0.341307	0.571959	0.0867341
51	12.4308	20.7347	3.146	36.3115	0.342337	0.571023	0.0866394
52	12.189	20.2368	3.07213	35.498	0.343373	0.570083	0.0865439
53	11.9482	19.7441	2.99898	34.6913	0.344415	0.569137	0.0864477
54	11.7083	19.2568	2.92657	33.8917	0.345463	0.568186	0.0863506
55	11.4695	18.7749	2.85491	33.0993	0.346518	0.567229	0.0862528
56	11.2318	18.2985	2.78401	32.3143	0.347579	0.566267	0.0861542
57	10.9952	17.8278	2.7139	31.5369	0.348646	0.565299	0.0860547
58	10.76	17.3628	2.64459	30.7673	0.34972	0.564325	0.0859544
59	10.526	16.9036	2.57609	30.0057	0.350801	0.563346	0.0858533
60	10.2936	16.4503	2.50842	29.2523	0.351889	0.56236	0.0857513
61	10.0626	16.003	2.44159	28.5072	0.352983	0.561368	0.0856484
62	9.83316	15.5618	2.37563	27.7706	0.354085	0.56037	0.0855446
63	9.60543	15.1268	2.31053	27.0428	0.355194	0.559366	0.0854399
64	9.37944	14.698	2.24632	26.3238	0.35631	0.558355	0.0853344
65	9.15529	14.2756	2.18302	25.6139	0.357434	0.557338	0.0852278
66	8.93304	13.8596	2.12063	24.9133	0.358565	0.556314	0.0851204
67	8.71279	13.4501	2.05916	24.2221	0.359705	0.555284	0.0850119
68	8.4946	13.0472	1.99864	23.5404	0.360851	0.554246	0.0849025
69	8.27856	12.6509	1.93907	22.8686	0.362006	0.553202	0.0847921
70	8.06475	12.2614	1.88047	22.2066	0.363169	0.55215	0.0846807
71	7.85324	11.8786	1.82284	21.5547	0.36434	0.551091	0.0845683
72	7.64412	11.5027	1.7662	20.913	0.36552	0.550025	0.0844548
73	7.43744	11.1336	1.71056	20.2816	0.366708	0.548952	0.0843403
74	7.2333	10.7716	1.65592	19.6608	0.367905	0.54787	0.0842247
75	7.03175	10.4165	1.6023	19.0505	0.36911	0.546782	0.084108
76	6.83287	10.0685	1.54971	18.451	0.370324	0.545685	0.0839903
77	6.63672	9.7275	1.49814	17.8624	0.371548	0.544581	0.0838714
78	6.44337	9.39366	1.44761	17.2846	0.37278	0.543468	0.0837514
79	6.25288	9.06696	1.39813	16.718	0.374022	0.542348	0.0836302
80	6.06531	8.74741	1.34969	16.1624	0.375273	0.541219	0.0835079
81	5.88072	8.43505	1.3023	15.6181	0.376533	0.540083	0.0833844
82	5.69915	8.12986	1.25597	15.085	0.377803	0.538937	0.0832597
83	5.52067	7.83186	1.2107	14.5632	0.379083	0.537784	0.0831338
84	5.3453	7.54104	1.16648	14.0528	0.380372	0.536621	0.0830067
85	5.1731	7.2574	1.12332	13.5538	0.381671	0.53545	0.0828784
86	5.0041	6.9809	1.08121	13.0662	0.38298	0.534271	0.0827488
87	4.83834	6.71153	1.04016	12.59	0.384299	0.533083	0.082618
88	4.67585	6.44926	1.00016	12.1253	0.385628	0.531886	0.0824859
89	4.51664	6.19404	0.961211	11.6719	0.386967	0.53068	0.0823526
90	4.36074	5.94583	0.923298	11.2299	0.388316	0.529466	0.082218
91	4.20817	5.70458	0.886419	10.7992	0.389676	0.528242	0.0820821
92	4.05893	5.47021	0.850564	10.3797	0.391045	0.52701	0.081945
93	3.91301	5.24265	0.815725	9.97139	0.392424	0.525769	0.0818066
94	3.77042	5.02183	0.781891	9.57415	0.393813	0.52452	0.0816669
95	3.63115	4.80766	0.749049	9.18785	0.395212	0.523262	0.081526
96	3.49517	4.60002	0.717184	8.81237	0.396621	0.521996	0.0813838
97	3.36245	4.39882	0.686282	8.44755	0.398039	0.520721	0.0812403
98	3.23296	4.20392	0.656323	8.0932	0.399466	0.519438	0.0810957
99	3.10664	4.01518	0.627289	7.74911	0.400902	0.518148	0.0809498
100	2.98342	3.83247	0.599157	7.41505	0.402347	0.51685	0.0808028
101	2.86324	3.65559	0.571901	7.09073	0.4038	0.515545	0.0806548
102	2.74598	3.48436	0.545492	6.77583	0.40526	0.514234	0.0805056
103	2.63152	3.31856	0.519898	6.46998	0.406728	0.512917	0.0803555
104	2.51971	3.15793	0.49508	6.17273	0.408201	0.511595	0.0802045
105	2.41036	3.00219	0.470994	5.88354	0.409679	0.510269	0.0800527
106	2.30324	2.85097	0.447585	5.6018	0.41116	0.508939	0.0799003
107	2.19803	2.70388	0.42479	5.3267	0.412644	0.507609	0.0797473
108	2.09436	2.56039	0.40253	5.05728	0.414127	0.506278	0.0795941
109	1.99173	2.41988	0.380706	4.79232	0.415609	0.50495	0.0794408
110	1.8895	2.28155	0.359193	4.53025	0.417085	0.503627	0.0792878
111	1.78681	2.14438	0.33783	4.26902	0.418554	0.502311	0.0791354
112	1.68253	2.007	0.316404	4.00593	0.42001	0.501007	0.0789839
113	1.5751	1.86762	0.29463	3.73735	0.421448	0.499718	0.078834
114	1.46238	1.72378	0.272119	3.45827	0.422864	0.49845	0.0786863
115	1.34139	1.57207	0.248331	3.16179	0.42425	0.497209	0.0785413
116	1.20789	1.40769	0.222506	2.83809	0.425599	0.496001	0.0784001
117	1.05576	1.22377	0.193553	2.47309	0.4269	0.494836	0.0782636
118	0.876072	1.01025	0.159875	2.0462	0.428146	0.493721	0.0781327
119	0.655494	0.752207	0.119104	1.52681	0.429324	0.492667	0.0780088
120	0.373848	0.427057	0.0676546	0.86856	0.430423	0.491684	0.0778929

## Sheet: White Females
age	Short Sleep LE	Optimal Sleep LE	Long Sleep LE	Total Life Expectancy	Short Proportion	Optional Proportion	Long Proportion
50	9.45023	20.9288	4.12977	34.5088	0.27385	0.606477	0.119673
51	9.19185	20.3639	4.05201	33.6077	0.273504	0.605929	0.120568
52	8.93563	19.8035	3.97375	32.7128	0.273154	0.605373	0.121474
53	8.68168	19.2476	3.89503	31.8244	0.2728	0.604809	0.122391
54	8.43007	18.6967	3.81588	30.9426	0.272442	0.604237	0.123321
55	8.1809	18.1507	3.73635	30.0679	0.27208	0.603656	0.124263
56	7.93426	17.61	3.65646	29.2007	0.271715	0.603067	0.125218
57	7.69024	17.0747	3.57627	28.3412	0.271345	0.602469	0.126186
58	7.44896	16.5451	3.49581	27.4899	0.270971	0.601862	0.127167
59	7.2105	16.0215	3.41514	26.6471	0.270592	0.601246	0.128162
60	6.97496	15.504	3.3343	25.8132	0.270209	0.600621	0.12917
61	6.74245	14.9928	3.25334	24.9886	0.269821	0.599986	0.130193
62	6.51308	14.4883	3.17233	24.1737	0.269429	0.59934	0.131231
63	6.28694	13.9906	3.09131	23.3688	0.269031	0.598685	0.132284
64	6.06414	13.4999	3.01034	22.5744	0.268629	0.598019	0.133352
65	5.84479	13.0166	2.92949	21.7909	0.268221	0.597342	0.134436
66	5.62899	12.5409	2.84881	21.0187	0.267809	0.596655	0.135537
67	5.41685	12.073	2.76837	20.2582	0.26739	0.595956	0.136654
68	5.20846	11.6131	2.68823	19.5098	0.266966	0.595245	0.137789
69	5.00392	11.1615	2.60847	18.7739	0.266537	0.594522	0.138941
70	4.80335	10.7184	2.52914	18.0508	0.266101	0.593787	0.140112
71	4.60682	10.2839	2.45033	17.3411	0.265659	0.593039	0.141302
72	4.41445	9.85848	2.37209	16.645	0.265211	0.592278	0.142511
73	4.2263	9.44215	2.29451	15.963	0.264757	0.591504	0.143739
74	4.04248	9.03517	2.21764	15.2953	0.264296	0.590716	0.144989
75	3.86306	8.63773	2.14157	14.6424	0.263828	0.589914	0.146259
76	3.68812	8.24999	2.06636	14.0045	0.263353	0.589097	0.14755
77	3.51772	7.87212	1.99208	13.3819	0.262871	0.588265	0.148864
78	3.35193	7.50429	1.91881	12.775	0.262382	0.587418	0.1502
79	3.19081	7.14661	1.84661	12.184	0.261885	0.586556	0.15156
80	3.0344	6.79921	1.77554	11.6092	0.26138	0.585677	0.152943
81	2.88274	6.4622	1.70568	11.0506	0.260867	0.584782	0.154351
82	2.73588	6.13565	1.63708	10.5086	0.260346	0.583869	0.155785
83	2.59382	5.81964	1.5698	9.98326	0.259817	0.582939	0.157244
84	2.45659	5.5142	1.50391	9.4747	0.259279	0.581992	0.158729
85	2.3242	5.21936	1.43945	8.98301	0.258733	0.581026	0.160242
86	2.19663	4.93513	1.37648	8.50824	0.258177	0.580041	0.161782
87	2.07388	4.66148	1.31504	8.0504	0.257612	0.579037	0.163351
88	1.95593	4.39838	1.25517	7.60947	0.257038	0.578013	0.164948
89	1.84273	4.14576	1.19691	7.1854	0.256455	0.57697	0.166576
90	1.73425	3.90354	1.1403	6.77809	0.255861	0.575905	0.168233
91	1.63044	3.67162	1.08536	6.38741	0.255258	0.57482	0.169921
92	1.53123	3.44986	1.03211	6.0132	0.254645	0.573714	0.171641
93	1.43656	3.23813	0.980582	5.65526	0.254021	0.572586	0.173393
94	1.34634	3.03625	0.930778	5.31336	0.253387	0.571436	0.175177
95	1.26049	2.84404	0.882711	4.98724	0.252743	0.570263	0.176994
96	1.17891	2.6613	0.836383	4.67659	0.252087	0.569068	0.178845
97	1.1015	2.4878	0.791793	4.38109	0.251421	0.567849	0.180729
98	1.02815	2.32332	0.748933	4.10041	0.250744	0.566607	0.182648
99	0.958754	2.1676	0.707793	3.83415	0.250056	0.565341	0.184602
100	0.89318	2.02039	0.668357	3.58193	0.249357	0.564051	0.186591
101	0.831307	1.88141	0.630604	3.34332	0.248647	0.562737	0.188616
102	0.773007	1.75039	0.59451	3.1179	0.247925	0.561399	0.190676
103	0.718148	1.62703	0.560046	2.90522	0.247192	0.560035	0.192772
104	0.666596	1.51104	0.527182	2.70481	0.246448	0.558647	0.194905
105	0.618216	1.40212	0.49588	2.51622	0.245692	0.557234	0.197074
106	0.57287	1.29998	0.466105	2.33896	0.244925	0.555796	0.199279
107	0.530422	1.20432	0.437814	2.17255	0.244147	0.554332	0.201521
108	0.490736	1.11482	0.410965	2.01652	0.243358	0.552844	0.203799
109	0.453677	1.0312	0.385514	1.87039	0.242557	0.55133	0.206114
110	0.419109	0.953165	0.361412	1.73369	0.241745	0.549791	0.208465
111	0.386902	0.880412	0.338612	1.60593	0.240922	0.548227	0.210852
112	0.356924	0.812654	0.317063	1.48664	0.240087	0.546638	0.213275
113	0.329043	0.749601	0.296709	1.37535	0.239243	0.545024	0.215733
114	0.303125	0.69095	0.277487	1.27156	0.238388	0.543387	0.218226
115	0.279014	0.636357	0.259312	1.17468	0.237523	0.541727	0.220751
116	0.256497	0.58534	0.242032	1.08387	0.23665	0.540047	0.223304
117	0.235163	0.536962	0.22529	0.997414	0.235772	0.538354	0.225874
118	0.213897	0.488683	0.20801	0.91059	0.234899	0.536666	0.228435
119	0.188846	0.431685	0.186318	0.806849	0.234054	0.535026	0.23092
120	0.143963	0.329249	0.143902	0.617114	0.233284	0.533531	0.233185

## Sheet: White Males
age	Short Sleep LE	Optimal Sleep LE	Long Sleep LE	Total Life Expectancy	Short Proportion	Optional Proportion	Long Proportion
50	7.9413	19.1173	3.68563	30.7442	0.258302	0.621818	0.11988
51	7.69182	18.5728	3.62575	29.8904	0.257334	0.621364	0.121301
52	7.44577	18.0334	3.56517	29.0443	0.256359	0.620892	0.122749
53	7.20323	17.4993	3.50391	28.2064	0.255375	0.620401	0.124224
54	6.96426	16.9707	3.44201	27.377	0.254384	0.619889	0.125727
55	6.72895	16.4478	3.37949	26.5563	0.253385	0.619358	0.127258
56	6.49737	15.931	3.3164	25.7447	0.252377	0.618805	0.128819
57	6.26959	15.4203	3.25276	24.9427	0.25136	0.618231	0.130409
58	6.04568	14.9161	3.18861	24.1504	0.250334	0.617634	0.132031
59	5.82572	14.4187	3.124	23.3684	0.249299	0.617016	0.133685
60	5.60978	13.9281	3.05897	22.5968	0.248255	0.616374	0.135371
61	5.39792	13.4447	2.99355	21.8362	0.247201	0.615708	0.137091
62	5.19023	12.9687	2.92781	21.0868	0.246137	0.615017	0.138846
63	4.98675	12.5004	2.86178	20.3489	0.245062	0.614302	0.140636
64	4.78756	12.0399	2.79553	19.623	0.243977	0.61356	0.142462
65	4.59271	11.5875	2.7291	18.9093	0.242882	0.612793	0.144326
66	4.40227	11.1433	2.66254	18.2082	0.241775	0.611997	0.146228
67	4.21629	10.7077	2.59592	17.5199	0.240656	0.611174	0.148169
68	4.03481	10.2808	2.5293	16.8449	0.239526	0.610322	0.150152
69	3.85789	9.86286	2.46273	16.1835	0.238384	0.60944	0.152175
70	3.68556	9.45397	2.39627	15.5358	0.23723	0.608528	0.154242
71	3.51786	9.05435	2.32999	14.9022	0.236063	0.607585	0.156352
72	3.35483	8.66417	2.26396	14.2829	0.234883	0.606609	0.158508
73	3.19648	8.28356	2.19823	13.6783	0.23369	0.6056	0.160709
74	3.04283	7.91268	2.13287	13.0884	0.232484	0.604558	0.162959
75	2.89391	7.55165	2.06794	12.5135	0.231263	0.60348	0.165257
76	2.74972	7.20057	2.00351	11.9538	0.230029	0.602367	0.167605
77	2.61025	6.85954	1.93965	11.4094	0.22878	0.601216	0.170004
78	2.4755	6.52863	1.87641	10.8805	0.227516	0.600028	0.172456
79	2.34545	6.2079	1.81386	10.3672	0.226237	0.598801	0.174961
80	2.22009	5.8974	1.75206	9.86955	0.224943	0.597535	0.177522
81	2.09938	5.59714	1.69107	9.38759	0.223634	0.596227	0.180139
82	1.9833	5.30712	1.63095	8.92137	0.222309	0.594877	0.182814
83	1.87179	5.02734	1.57176	8.47088	0.220967	0.593485	0.185548
84	1.7648	4.75775	1.51354	8.03609	0.21961	0.592048	0.188342
85	1.66229	4.49831	1.45635	7.61694	0.218236	0.590566	0.191198
86	1.56418	4.24893	1.40023	7.21334	0.216845	0.589038	0.194117
87	1.4704	4.00954	1.34524	6.82518	0.215437	0.587463	0.1971
88	1.38087	3.78001	1.29142	6.4523	0.214013	0.585839	0.200148
89	1.29552	3.56022	1.23879	6.09453	0.212571	0.584166	0.203263
90	1.21425	3.35002	1.1874	5.75167	0.211112	0.582443	0.206445
91	1.13696	3.14925	1.13729	5.4235	0.209635	0.580668	0.209696
92	1.06355	2.95774	1.08847	5.10976	0.208142	0.578841	0.213017
93	0.993928	2.77528	1.04096	4.81018	0.20663	0.576961	0.216409
94	0.927974	2.60168	0.994801	4.52446	0.205102	0.575026	0.219872
95	0.865576	2.43671	0.949993	4.25228	0.203556	0.573036	0.223408
96	0.80662	2.28015	0.906552	3.99332	0.201992	0.570991	0.227017
97	0.750986	2.13175	0.864483	3.74722	0.200412	0.568888	0.2307
98	0.698554	1.99126	0.823793	3.5136	0.198814	0.566728	0.234458
99	0.649202	1.85843	0.784479	3.29211	0.1972	0.56451	0.238291
100	0.602806	1.73299	0.746539	3.08233	0.195568	0.562232	0.242199
101	0.559244	1.61467	0.709965	2.88388	0.19392	0.559896	0.246184
102	0.518391	1.50321	0.674747	2.69635	0.192256	0.557499	0.250244
103	0.480126	1.39834	0.640871	2.51933	0.190577	0.555042	0.254381
104	0.444326	1.29976	0.60832	2.35241	0.188881	0.552524	0.258594
105	0.410871	1.20722	0.577075	2.19517	0.187171	0.549946	0.262884
106	0.379644	1.12044	0.547113	2.0472	0.185445	0.547306	0.267249
107	0.350527	1.03915	0.518409	1.90809	0.183706	0.544604	0.27169
108	0.323408	0.963087	0.490939	1.77743	0.181952	0.541841	0.276207
109	0.298176	0.891981	0.464672	1.65483	0.180186	0.539017	0.280798
110	0.274724	0.825579	0.439579	1.53988	0.178406	0.536131	0.285463
111	0.252948	0.76363	0.415628	1.43221	0.176614	0.533185	0.290201
112	0.232747	0.705888	0.392784	1.33142	0.174811	0.530177	0.295012
113	0.214022	0.652111	0.371011	1.23714	0.172997	0.52711	0.299893
114	0.196677	0.602056	0.350265	1.149	0.171173	0.523983	0.304844
115	0.180611	0.555463	0.330485	1.06656	0.16934	0.520799	0.309861
116	0.165701	0.512001	0.311554	0.989255	0.167501	0.517562	0.314937
117	0.15174	0.471062	0.293161	0.915963	0.165661	0.514281	0.320058
118	0.138173	0.430945	0.274244	0.843362	0.163836	0.510984	0.325179
119	0.122914	0.385083	0.250415	0.758411	0.162067	0.507749	0.330183
120	0.0960276	0.302087	0.200348	0.598462	0.160457	0.504772	0.334771
